# Supplementary material for: Apolipoprotein M promotes the anti-inflammatory effect of high-density lipoprotein by binding to scavenger receptor BI
Source: PubMed Central journal article supplement — Ann Transl Med. 2020 Dec;8(24):1676. doi: 10.21037/atm-20-7008 (PMC7812182; doi:10.21037/atm-20-7008), 2020-12
Supplement: atm-08-24-1676-dss.pdf [file atm-08-24-1676-dss.pdf]

## Data Sharing Statement

|                     |                                                                                                                                                     |                                                                                                                                                   |
|---------------------|-----------------------------------------------------------------------------------------------------------------------------------------------------|---------------------------------------------------------------------------------------------------------------------------------------------------|
| <b>Article Info</b> | <a href="http://dx.doi.org/10.21037/atm-20-7008">http://dx.doi.org/10.21037/atm-20-7008</a>                                                         |                                                                                                                                                   |
| <b>Item</b>         | <b>Question</b>                                                                                                                                     | <b>Authors' Response<br/>(place "-" if not applicable)</b>                                                                                        |
| 1                   | Would you like to share data collected for your study to others?                                                                                    | Yes.                                                                                                                                              |
| 2                   | If not, would you like to share the reason for your decision?                                                                                       | -                                                                                                                                                 |
| 3                   | What data in particular will be shared?                                                                                                             | The original pictures of confocal microscopy in particular will be shared because it is the first time to define the expression of apoM in PBMCs. |
| 4                   | Any other documents will be shared? Such as study protocol, statistical analysis plan, informed consent form, clinical study report, analytic code. | Study protocol and statistical analysis plan will also be shared if requested.                                                                    |
| 5                   | When will data availability begin?                                                                                                                  | From the publication date.                                                                                                                        |
| 6                   | When will data availability end?                                                                                                                    | Two years within the publication date.                                                                                                            |
| 7                   | To whom will you share the data?                                                                                                                    | All readers.                                                                                                                                      |
| 8                   | For what type of analysis or purpose?                                                                                                               | For analysis to evaluate the effect of apoM in disease.                                                                                           |
| 9                   | How or where can the data/documents be obtained?                                                                                                    | Emails could be sent to the address below to obtain the shared data: yaoshuang1023@163.com.                                                       |
| 10                  | Any other restrictions?                                                                                                                             | We may balance the potential benefits and risks for each request and then provide the data that could be shared.                                  |
